# Supplementary material
Source: publisher figshare collection journal article supplement (https://acs.figshare.com/ndownloader/files/4241674)
Supplement: Supplementary file 1 [file 4241674]

 
data_pbca 
 
_publ_contact_author             'Makoto Fujita'
_publ_contact_author_email       'mfujita@appchem.t.u-tokyo.ac.jp'
_publ_author_address             'Hongo 7-3-1, Bunkyo-ku, Tokyo 113-8656, Japan'

_publ_author_name   
;
Koki Ikemoto, Yasuhide Inokuma, Makoto Fujita
;
_publ_requested_journal     'J. Am. Chem. Soc.'

_publ_section_title  
;
Diels-Alder via Molecular Recognition in Crystalline Molecular Flasks
;  
_audit_creation_method            SHELXL-97 
_chemical_name_systematic 
; 
 ? 
; 
_chemical_name_common             ? 
_chemical_melting_point           ? 
_chemical_formula_moiety          ? 
_chemical_formula_sum 
 'C82 H60 I6 N16 O8 Zn3' 
_chemical_formula_weight          2355.03 
  
loop_ 
 _atom_type_symbol 
 _atom_type_description 
 _atom_type_scat_dispersion_real 
 _atom_type_scat_dispersion_imag 
 _atom_type_scat_source 
 'C'  'C'   0.0033   0.0016 
 'International Tables Vol C Tables 4.2.6.8 and 6.1.1.4' 
 'H'  'H'   0.0000   0.0000 
 'International Tables Vol C Tables 4.2.6.8 and 6.1.1.4' 
 'N'  'N'   0.0061   0.0033 
 'International Tables Vol C Tables 4.2.6.8 and 6.1.1.4' 
 'O'  'O'   0.0106   0.0060 
 'International Tables Vol C Tables 4.2.6.8 and 6.1.1.4' 
 'Zn'  'Zn'   0.2839   1.4301 
 'International Tables Vol C Tables 4.2.6.8 and 6.1.1.4' 
 'I'  'I'  -0.4742   1.8119 
 'International Tables Vol C Tables 4.2.6.8 and 6.1.1.4' 
  
_symmetry_cell_setting            Orthorhombic 
_symmetry_space_group_name_H-M    Pbca 
  
loop_ 
 _symmetry_equiv_pos_as_xyz 
 'x, y, z' 
 '-x+1/2, -y, z+1/2' 
 '-x, y+1/2, -z+1/2' 
 'x+1/2, -y+1/2, -z' 
 '-x, -y, -z' 
 'x-1/2, y, -z-1/2' 
 'x, -y-1/2, z-1/2' 
 '-x-1/2, y-1/2, z' 
  
_cell_length_a                    27.165(4) 
_cell_length_b                    13.745(2) 
_cell_length_c                    46.162(7) 
_cell_angle_alpha                 90.00 
_cell_angle_beta                  90.00 
_cell_angle_gamma                 90.00 
_cell_volume                      17236(4) 
_cell_formula_units_Z             8 
_cell_measurement_temperature     90(2) 
_cell_measurement_reflns_used     8439 
_cell_measurement_theta_min       2.42 
_cell_measurement_theta_max       27.83 
  
_exptl_crystal_description        'prism' 
_exptl_crystal_colour             'yellow' 
_exptl_crystal_size_max           0.06 
_exptl_crystal_size_mid           0.05 
_exptl_crystal_size_min           0.04 
_exptl_crystal_density_meas       ? 
_exptl_crystal_density_diffrn     1.815 
_exptl_crystal_density_method     'not measured' 
_exptl_crystal_F_000              9088 
_exptl_absorpt_coefficient_mu     3.041 
_exptl_absorpt_correction_type    'empirical' 
_exptl_absorpt_correction_T_min   0.8386 
_exptl_absorpt_correction_T_max   0.8881 
_exptl_absorpt_process_details    SADABS 
  
_exptl_special_details 
; 
 ? 
; 
  
_diffrn_ambient_temperature       90(2) 
_diffrn_radiation_wavelength      0.71073 
_diffrn_radiation_type            MoK\a 
_diffrn_radiation_source          'fine-focus sealed tube' 
_diffrn_radiation_monochromator   graphite 
_diffrn_measurement_device_type   'CCD area detector' 
_diffrn_measurement_method        'phi and omega scans' 
_diffrn_detector_area_resol_mean  ? 
_diffrn_standards_number          ? 
_diffrn_standards_interval_count  ? 
_diffrn_standards_interval_time   ? 
_diffrn_standards_decay_%         ? 
_diffrn_reflns_number             183748 
_diffrn_reflns_av_R_equivalents   0.0867 
_diffrn_reflns_av_sigmaI/netI     0.0561 
_diffrn_reflns_limit_h_min        -34 
_diffrn_reflns_limit_h_max        35 
_diffrn_reflns_limit_k_min        -18 
_diffrn_reflns_limit_k_max        18 
_diffrn_reflns_limit_l_min        -61 
_diffrn_reflns_limit_l_max        58 
_diffrn_reflns_theta_min          1.50 
_diffrn_reflns_theta_max          28.52 
_reflns_number_total              20760 
_reflns_number_gt                 14762 
_reflns_threshold_expression      >2sigma(I) 
  
_computing_data_collection        'Bruker SMART' 
_computing_cell_refinement        'Bruker SMART' 
_computing_data_reduction         'Bruker SAINT' 
_computing_structure_solution     'SHELXS-97 (Sheldrick, 1990)' 
_computing_structure_refinement   'SHELXL-97 (Sheldrick, 1997)' 
_computing_molecular_graphics     'Bruker SHELXTL' 
_computing_publication_material   'Bruker SHELXTL' 
  
_refine_special_details 
; 
 Refinement of F^2^ against ALL reflections.  The weighted R-factor wR and 
 goodness of fit S are based on F^2^, conventional R-factors R are based 
 on F, with F set to zero for negative F^2^. The threshold expression of 
 F^2^ > 2sigma(F^2^) is used only for calculating R-factors(gt) etc. and is 
 not relevant to the choice of reflections for refinement.  R-factors based 
 on F^2^ are statistically about twice as large as those based on F, and R- 
 factors based on ALL data will be even larger. 
; 
  
_refine_ls_structure_factor_coef  Fsqd 
_refine_ls_matrix_type            full 
_refine_ls_weighting_scheme       calc 
_refine_ls_weighting_details 
 'calc w=1/[\s^2^(Fo^2^)+(0.0630P)^2^+218.9192P] where P=(Fo^2^+2Fc^2^)/3' 
_atom_sites_solution_primary      direct 
_atom_sites_solution_secondary    difmap 
_atom_sites_solution_hydrogens    geom 
_refine_ls_hydrogen_treatment     constr 
_refine_ls_extinction_method      none 
_refine_ls_extinction_coef        ? 
_refine_ls_number_reflns          20760 
_refine_ls_number_parameters      1083 
_refine_ls_number_restraints      178 
_refine_ls_R_factor_all           0.0944 
_refine_ls_R_factor_gt            0.0556 
_refine_ls_wR_factor_ref          0.1445 
_refine_ls_wR_factor_gt           0.1251 
_refine_ls_goodness_of_fit_ref    0.930 
_refine_ls_restrained_S_all       0.931 
_refine_ls_shift/su_max           0.001 
_refine_ls_shift/su_mean          0.000 
  
loop_ 
 _atom_site_label 
 _atom_site_type_symbol 
 _atom_site_fract_x 
 _atom_site_fract_y 
 _atom_site_fract_z 
 _atom_site_U_iso_or_equiv 
 _atom_site_adp_type 
 _atom_site_occupancy 
 _atom_site_symmetry_multiplicity 
 _atom_site_calc_flag 
 _atom_site_refinement_flags 
 _atom_site_disorder_assembly 
 _atom_site_disorder_group 
C1X C 0.7552(3) 0.6756(4) 0.35227(14) 0.0213(13) Uani 1 1 d . . . 
C2X C 0.8072(3) 0.6738(5) 0.35125(14) 0.0225(14) Uani 1 1 d . . . 
H2XA H 0.8232 0.6864 0.3334 0.027 Uiso 1 1 calc R . . 
C3X C 0.8355(3) 0.6538(5) 0.37571(16) 0.0277(15) Uani 1 1 d . . . 
C4X C 0.8108(3) 0.6337(5) 0.40183(15) 0.0274(15) Uani 1 1 d . . . 
H4XA H 0.8296 0.6197 0.4187 0.033 Uiso 1 1 calc R . . 
C5X C 0.7605(3) 0.6336(5) 0.40366(15) 0.0267(15) Uani 1 1 d . . . 
H5XA H 0.7449 0.6194 0.4216 0.032 Uiso 1 1 calc R . . 
C6X C 0.7314(3) 0.6546(4) 0.37898(15) 0.0225(14) Uani 1 1 d . . . 
C7X C 0.6773(3) 0.6545(4) 0.38025(15) 0.0240(14) Uani 1 1 d . . . 
C8X C 0.6527(3) 0.6373(5) 0.40696(16) 0.0290(16) Uani 1 1 d . . . 
H8XA H 0.6713 0.6276 0.4242 0.035 Uiso 1 1 calc R . . 
C9X C 0.6017(3) 0.6348(5) 0.40798(19) 0.0387(19) Uani 1 1 d . . . 
H9XA H 0.5855 0.6244 0.4259 0.046 Uiso 1 1 calc R . . 
C10X C 0.5741(3) 0.6475(5) 0.38261(19) 0.0359(18) Uani 1 1 d . . . 
H10A H 0.5392 0.6444 0.3833 0.043 Uiso 1 1 calc R . . 
C11X C 0.5978(3) 0.6644(5) 0.35672(17) 0.0297(16) Uani 1 1 d . . . 
H11A H 0.5789 0.6725 0.3396 0.036 Uiso 1 1 calc R . . 
C12X C 0.6498(3) 0.6701(5) 0.35511(15) 0.0240(14) Uani 1 1 d . . . 
C13X C 0.6741(3) 0.6944(4) 0.32768(14) 0.0224(14) Uani 1 1 d . . . 
C14X C 0.6472(3) 0.7182(5) 0.30253(15) 0.0292(16) Uani 1 1 d . . . 
H14A H 0.6123 0.7171 0.3033 0.035 Uiso 1 1 calc R . . 
C15X C 0.6697(3) 0.7429(5) 0.27720(16) 0.0298(16) Uani 1 1 d . . . 
H15A H 0.6505 0.7566 0.2605 0.036 Uiso 1 1 calc R . . 
C16X C 0.7209(3) 0.7481(4) 0.27571(15) 0.0261(15) Uani 1 1 d . . . 
H16A H 0.7366 0.7659 0.2581 0.031 Uiso 1 1 calc R . . 
C17X C 0.7486(3) 0.7270(4) 0.30013(14) 0.0221(14) Uani 1 1 d . . . 
H17A H 0.7835 0.7319 0.2992 0.027 Uiso 1 1 calc R . . 
C18X C 0.7261(3) 0.6986(4) 0.32638(14) 0.0200(13) Uani 1 1 d . . . 
C19X C 0.8893(3) 0.6536(5) 0.37456(17) 0.0293(16) Uani 1 1 d . . . 
H19A H 0.9058 0.6533 0.3927 0.035 Uiso 1 1 calc R . . 
C20X C 0.9180(3) 0.6537(6) 0.35102(18) 0.0356(18) Uani 1 1 d . . . 
H20A H 0.9026 0.6524 0.3326 0.043 Uiso 1 1 calc R . . 
C21X C 0.9715(3) 0.6559(6) 0.3521(2) 0.041(2) Uani 1 1 d . . . 
H21A H 0.9872 0.6637 0.3704 0.050 Uiso 1 1 calc R . . 
C22X C 0.9989(4) 0.6474(8) 0.3289(2) 0.063(3) Uani 1 1 d . . . 
H22B H 0.9839 0.6396 0.3105 0.075 Uiso 1 1 calc R . . 
H22C H 1.0337 0.6491 0.3305 0.075 Uiso 1 1 calc R . . 
C1A C 0.7005(4) 0.8152(7) 0.47653(17) 0.044(2) Uani 1 1 d . . . 
C2A C 0.7153(4) 0.9093(8) 0.47444(18) 0.051(3) Uani 1 1 d . . . 
H2AA H 0.7492 0.9254 0.4731 0.061 Uiso 1 1 calc R . . 
C3A C 0.6799(5) 0.9802(7) 0.4744(2) 0.057(3) Uani 1 1 d . . . 
H3AA H 0.6894 1.0466 0.4732 0.069 Uiso 1 1 calc R . . 
C4A C 0.6295(5) 0.9557(8) 0.47601(17) 0.063(3) Uani 1 1 d . . . 
H4AA H 0.6048 1.0047 0.4759 0.076 Uiso 1 1 calc R . . 
C5A C 0.6167(4) 0.8568(8) 0.47786(17) 0.050(3) Uani 1 1 d . . . 
H5AA H 0.5830 0.8386 0.4788 0.060 Uiso 1 1 calc R . . 
C6A C 0.6520(4) 0.7871(7) 0.47838(16) 0.043(2) Uani 1 1 d . . . 
H6AA H 0.6435 0.7204 0.4800 0.052 Uiso 1 1 calc R . . 
N1A N 0.7391(4) 0.7351(8) 0.47745(18) 0.066(3) Uani 1 1 d . . . 
O1A O 0.7818(4) 0.7604(9) 0.47450(19) 0.101(3) Uani 1 1 d . . . 
O2A O 0.7240(4) 0.6516(6) 0.4810(2) 0.093(3) Uani 1 1 d . . . 
C1B C 0.7231(3) -0.0343(5) 0.56883(19) 0.066(3) Uani 1 1 d GU . . 
C2B C 0.7259(3) 0.0416(7) 0.54902(15) 0.081(4) Uani 1 1 d GU . . 
H2BA H 0.7394 0.0307 0.5303 0.097 Uiso 1 1 calc R . . 
C3B C 0.7089(4) 0.1336(6) 0.5566(2) 0.112(5) Uani 1 1 d GU . . 
H3BA H 0.7109 0.1855 0.5430 0.134 Uiso 1 1 calc R . . 
C4B C 0.6892(3) 0.1496(5) 0.5839(2) 0.098(5) Uani 1 1 d GU . . 
H4BA H 0.6776 0.2125 0.5891 0.118 Uiso 1 1 calc R . . 
C5B C 0.6864(3) 0.0737(7) 0.60374(16) 0.080(4) Uani 1 1 d GU . . 
H5BA H 0.6729 0.0846 0.6224 0.096 Uiso 1 1 calc R . . 
C6B C 0.7033(3) -0.0183(6) 0.59619(16) 0.079(4) Uani 1 1 d GU . . 
H6BA H 0.7014 -0.0702 0.6097 0.094 Uiso 1 1 calc R . . 
N1B N 0.7385(4) -0.1234(10) 0.5601(3) 0.095(4) Uani 1 1 d U . . 
O1B O 0.7643(3) -0.1336(7) 0.5359(2) 0.085(3) Uani 1 1 d U . . 
O2B O 0.7293(5) -0.1873(10) 0.5782(3) 0.143(5) Uani 1 1 d U . . 
C1D C 0.5581(3) 0.9227(7) 0.22831(17) 0.039(2) Uani 1 1 d . . . 
C2D C 0.5535(5) 0.8646(8) 0.2043(2) 0.072(4) Uani 1 1 d . . . 
H2DA H 0.5489 0.7964 0.2062 0.087 Uiso 1 1 calc R . . 
C3D C 0.5558(7) 0.9077(9) 0.1775(2) 0.094(5) Uani 1 1 d . . . 
H3DA H 0.5520 0.8689 0.1606 0.113 Uiso 1 1 calc R . . 
C4D C 0.5635(5) 1.0062(8) 0.1747(2) 0.067(3) Uani 1 1 d . . . 
H4DA H 0.5650 1.0347 0.1560 0.080 Uiso 1 1 calc R . . 
C5D C 0.5689(4) 1.0629(8) 0.1986(2) 0.062(3) Uani 1 1 d . . . 
H5DA H 0.5747 1.1308 0.1966 0.074 Uiso 1 1 calc R . . 
C6D C 0.5660(4) 1.0214(7) 0.2259(2) 0.048(2) Uani 1 1 d . . . 
H6DA H 0.5695 1.0605 0.2428 0.058 Uiso 1 1 calc R . . 
N1D N 0.5550(3) 0.8780(7) 0.25699(16) 0.0476(19) Uani 1 1 d . . . 
O1D O 0.5441(3) 0.7922(5) 0.25889(15) 0.0617(19) Uani 1 1 d . . . 
O2D O 0.5625(3) 0.9285(7) 0.27804(14) 0.072(2) Uani 1 1 d . . . 
C1E C 0.5860(3) 0.3810(4) 0.26261(14) 0.031(2) Uani 0.833(10) 1 d PGDU A 1 
C2E C 0.5755(3) 0.3809(5) 0.23314(13) 0.044(3) Uani 0.833(10) 1 d PGDU A 1 
H2EA H 0.5798 0.3231 0.2221 0.052 Uiso 0.833(10) 1 calc PR A 1 
C3E C 0.5586(3) 0.4652(6) 0.21980(12) 0.061(4) Uani 0.833(10) 1 d PGU A 1 
H3EA H 0.5515 0.4652 0.1997 0.073 Uiso 0.833(10) 1 calc PR A 1 
C4E C 0.5523(3) 0.5497(4) 0.23594(18) 0.063(4) Uani 0.833(10) 1 d PGU A 1 
H4EA H 0.5408 0.6073 0.2268 0.076 Uiso 0.833(10) 1 calc PR A 1 
C5E C 0.5628(3) 0.5498(4) 0.26541(18) 0.056(4) Uani 0.833(10) 1 d PGU A 1 
H5EA H 0.5585 0.6075 0.2764 0.067 Uiso 0.833(10) 1 calc PR A 1 
C6E C 0.5796(3) 0.4654(5) 0.27875(12) 0.045(3) Uani 0.833(10) 1 d PGDU A 1 
H6EA H 0.5868 0.4655 0.2989 0.054 Uiso 0.833(10) 1 calc PR A 1 
N1E N 0.6053(3) 0.2952(6) 0.2763(2) 0.044(2) Uani 0.833(10) 1 d PDU A 1 
O1E O 0.5999(4) 0.2168(6) 0.2637(3) 0.064(3) Uani 0.833(10) 1 d PDU A 1 
O2E O 0.6271(3) 0.3056(6) 0.29933(18) 0.061(3) Uani 0.833(10) 1 d PDU A 1 
C1G C 0.583(2) 0.355(2) 0.2652(7) 0.069(11) Uani 0.167(10) 1 d PGDU A 2 
C2G C 0.579(2) 0.423(3) 0.2430(7) 0.078(12) Uani 0.167(10) 1 d PGDU A 2 
H2GA H 0.5842 0.4035 0.2235 0.094 Uiso 0.167(10) 1 calc PR A 2 
C3G C 0.567(2) 0.519(2) 0.2494(10) 0.077(13) Uani 0.167(10) 1 d PGU A 2 
H3GA H 0.5645 0.5651 0.2343 0.093 Uiso 0.167(10) 1 calc PR A 2 
C4G C 0.560(2) 0.547(2) 0.2780(11) 0.076(13) Uani 0.167(10) 1 d PGU A 2 
H4GA H 0.5518 0.6124 0.2824 0.092 Uiso 0.167(10) 1 calc PR A 2 
C5G C 0.564(2) 0.479(3) 0.3002(8) 0.073(12) Uani 0.167(10) 1 d PGU A 2 
H5GA H 0.5590 0.4981 0.3197 0.087 Uiso 0.167(10) 1 calc PR A 2 
C6G C 0.576(2) 0.383(2) 0.2937(7) 0.068(12) Uani 0.167(10) 1 d PGDU A 2 
H6GA H 0.5788 0.3364 0.3089 0.082 Uiso 0.167(10) 1 calc PR A 2 
N1G N 0.595(3) 0.253(3) 0.2591(8) 0.066(12) Uani 0.167(10) 1 d PDU A 2 
O1G O 0.5865(19) 0.219(3) 0.2351(7) 0.078(14) Uani 0.167(10) 1 d PDU A 2 
O2G O 0.609(2) 0.202(3) 0.2796(8) 0.072(14) Uani 0.167(10) 1 d PDU A 2 
Zn1 Zn 0.75044(3) 0.14559(5) 0.192561(15) 0.01841(15) Uani 1 1 d . . . 
Zn2 Zn 0.46429(3) -0.15445(5) 0.404304(16) 0.01923(16) Uani 1 1 d . . . 
Zn3 Zn 0.95086(3) -0.14347(5) 0.435662(15) 0.01898(16) Uani 1 1 d . . . 
I1 I 0.697289(18) 0.29735(3) 0.200877(10) 0.02618(11) Uani 1 1 d . . . 
I2 I 0.841937(18) 0.16188(4) 0.181227(11) 0.03387(12) Uani 1 1 d . . . 
I3 I 0.474295(19) -0.24234(3) 0.452619(10) 0.03127(12) Uani 1 1 d . . . 
I4 I 0.419856(19) -0.22858(4) 0.361046(11) 0.03588(13) Uani 1 1 d . . . 
I5 I 1.017838(17) -0.05366(4) 0.408154(10) 0.02876(11) Uani 1 1 d . . . 
I6 I 0.95903(2) -0.32050(3) 0.451566(11) 0.03207(12) Uani 1 1 d . . . 
C1 C 0.6985(2) 0.0568(5) 0.24182(14) 0.0223(14) Uani 1 1 d . . . 
H1A H 0.6708 0.0796 0.2313 0.027 Uiso 1 1 calc R . . 
C2 C 0.6912(2) 0.0195(5) 0.26916(14) 0.0210(13) Uani 1 1 d . . . 
H2A H 0.6591 0.0153 0.2771 0.025 Uiso 1 1 calc R . . 
C3 C 0.7318(2) -0.0121(4) 0.28489(13) 0.0166(12) Uani 1 1 d . . . 
C4 C 0.7779(2) -0.0087(4) 0.27175(13) 0.0170(12) Uani 1 1 d . . . 
H4A H 0.8062 -0.0318 0.2817 0.020 Uiso 1 1 calc R . . 
C5 C 0.7818(2) 0.0285(4) 0.24424(13) 0.0177(12) Uani 1 1 d . . . 
H5A H 0.8133 0.0302 0.2353 0.021 Uiso 1 1 calc R . . 
C6 C 0.5725(2) -0.1147(5) 0.40570(14) 0.0212(13) Uani 1 1 d . . . 
H6A H 0.5676 -0.1222 0.4260 0.025 Uiso 1 1 calc R . . 
C7 C 0.6199(2) -0.1022(5) 0.39561(13) 0.0186(13) Uani 1 1 d . . . 
H7A H 0.6470 -0.1016 0.4086 0.022 Uiso 1 1 calc R . . 
C8 C 0.6271(2) -0.0907(4) 0.36605(13) 0.0160(12) Uani 1 1 d . . . 
C9 C 0.5865(2) -0.0895(5) 0.34776(13) 0.0197(13) Uani 1 1 d . . . 
H9A H 0.5903 -0.0787 0.3276 0.024 Uiso 1 1 calc R . . 
C10 C 0.5403(2) -0.1043(5) 0.35968(13) 0.0198(13) Uani 1 1 d . . . 
H10B H 0.5126 -0.1058 0.3471 0.024 Uiso 1 1 calc R . . 
C11 C 0.8914(2) -0.1013(5) 0.38258(13) 0.0194(13) Uani 1 1 d . . . 
H11B H 0.9232 -0.0950 0.3743 0.023 Uiso 1 1 calc R . . 
C12 C 0.8508(2) -0.0870(4) 0.36509(13) 0.0172(12) Uani 1 1 d . . . 
H12A H 0.8548 -0.0716 0.3452 0.021 Uiso 1 1 calc R . . 
C13 C 0.8040(2) -0.0954(4) 0.37702(13) 0.0169(12) Uani 1 1 d . . . 
C14 C 0.8000(3) -0.1185(5) 0.40594(14) 0.0209(13) Uani 1 1 d . . . 
H14B H 0.7685 -0.1243 0.4147 0.025 Uiso 1 1 calc R . . 
C15 C 0.8422(2) -0.1332(5) 0.42208(14) 0.0206(13) Uani 1 1 d . . . 
H15B H 0.8391 -0.1505 0.4419 0.025 Uiso 1 1 calc R . . 
C16 C 0.7261(2) -0.0437(4) 0.31553(12) 0.0152(12) Uani 1 1 d . . . 
C17 C 0.6776(2) -0.0774(4) 0.35386(13) 0.0156(12) Uani 1 1 d . . . 
C18 C 0.7598(2) -0.0809(4) 0.35861(13) 0.0159(12) Uani 1 1 d . . . 
C19 C 0.8987(3) -0.1054(5) 0.49129(14) 0.0236(14) Uani 1 1 d . . . 
H19B H 0.8879 -0.1703 0.4882 0.028 Uiso 1 1 calc R . . 
C20 C 0.8805(3) -0.0548(5) 0.51496(14) 0.0233(14) Uani 1 1 d . . . 
H20B H 0.8575 -0.0842 0.5277 0.028 Uiso 1 1 calc R . . 
C21 C 0.8967(2) 0.0404(5) 0.51964(13) 0.0197(13) Uani 1 1 d . . . 
C22 C 0.9305(2) 0.0804(5) 0.50059(13) 0.0187(13) Uani 1 1 d . . . 
H22A H 0.9422 0.1448 0.5034 0.022 Uiso 1 1 calc R . . 
C23 C 0.9469(2) 0.0252(5) 0.47726(14) 0.0195(13) Uani 1 1 d . . . 
H23A H 0.9701 0.0528 0.4642 0.023 Uiso 1 1 calc R . . 
C24 C 0.7869(3) 0.0300(5) 0.66159(15) 0.0244(14) Uani 1 1 d . . . 
H24A H 0.7735 0.0628 0.6779 0.029 Uiso 1 1 calc R . . 
C25 C 0.8076(3) 0.0848(5) 0.63939(15) 0.0256(15) Uani 1 1 d . . . 
H25A H 0.8083 0.1538 0.6405 0.031 Uiso 1 1 calc R . . 
C26 C 0.8273(2) 0.0370(4) 0.61558(13) 0.0174(12) Uani 1 1 d . . . 
C27 C 0.8266(3) -0.0644(5) 0.61515(14) 0.0235(14) Uani 1 1 d . . . 
H27A H 0.8404 -0.0991 0.5993 0.028 Uiso 1 1 calc R . . 
C28 C 0.8053(3) -0.1138(5) 0.63818(14) 0.0229(14) Uani 1 1 d . . . 
H28A H 0.8050 -0.1829 0.6379 0.027 Uiso 1 1 calc R . . 
C29 C 0.9239(3) 0.4879(5) 0.56066(14) 0.0223(14) Uani 1 1 d . . . 
H29A H 0.9284 0.5314 0.5449 0.027 Uiso 1 1 calc R . . 
C30 C 0.9070(3) 0.3937(5) 0.55496(14) 0.0240(14) Uani 1 1 d . . . 
H30A H 0.9012 0.3727 0.5356 0.029 Uiso 1 1 calc R . . 
C31 C 0.8989(2) 0.3314(5) 0.57827(14) 0.0190(13) Uani 1 1 d . . . 
C32 C 0.9084(3) 0.3648(5) 0.60601(14) 0.0244(15) Uani 1 1 d . . . 
H32A H 0.9028 0.3240 0.6223 0.029 Uiso 1 1 calc R . . 
C33 C 0.9258(3) 0.4574(5) 0.60965(15) 0.0278(16) Uani 1 1 d . . . 
H33A H 0.9326 0.4795 0.6287 0.033 Uiso 1 1 calc R . . 
C34 C 0.8799(2) 0.0946(5) 0.54580(13) 0.0203(13) Uani 1 1 d . . . 
C35 C 0.8498(2) 0.0922(5) 0.59118(14) 0.0197(13) Uani 1 1 d . . . 
C36 C 0.8827(2) 0.2297(5) 0.57351(14) 0.0197(13) Uani 1 1 d . . . 
N1 N 0.7431(2) 0.0624(4) 0.22945(11) 0.0183(11) Uani 1 1 d . . . 
N2 N 0.5329(2) -0.1167(4) 0.38820(12) 0.0196(11) Uani 1 1 d . . . 
N3 N 0.88773(19) -0.1238(4) 0.41066(11) 0.0167(10) Uani 1 1 d . . . 
N4 N 0.6804(2) -0.0530(4) 0.32578(11) 0.0171(11) Uani 1 1 d . . . 
N5 N 0.7157(2) -0.0921(4) 0.37133(11) 0.0159(10) Uani 1 1 d . . . 
N6 N 0.76726(19) -0.0577(4) 0.33087(11) 0.0160(10) Uani 1 1 d . . . 
N7 N 0.93095(19) -0.0663(4) 0.47261(11) 0.0183(11) Uani 1 1 d . . . 
N8 N 0.7852(2) -0.0675(4) 0.66079(11) 0.0187(11) Uani 1 1 d . . . 
N9 N 0.9338(2) 0.5188(4) 0.58736(11) 0.0182(11) Uani 1 1 d . . . 
N10 N 0.8571(2) 0.0431(4) 0.56646(11) 0.0189(11) Uani 1 1 d . . . 
N11 N 0.8618(2) 0.1844(4) 0.59597(11) 0.0197(11) Uani 1 1 d . . . 
N12 N 0.8919(2) 0.1893(4) 0.54746(12) 0.0204(11) Uani 1 1 d . . . 
  
loop_ 
 _atom_site_aniso_label 
 _atom_site_aniso_U_11 
 _atom_site_aniso_U_22 
 _atom_site_aniso_U_33 
 _atom_site_aniso_U_23 
 _atom_site_aniso_U_13 
 _atom_site_aniso_U_12 
C1X 0.031(4) 0.007(3) 0.026(3) -0.004(2) -0.001(3) -0.002(3) 
C2X 0.029(4) 0.017(3) 0.022(3) -0.002(2) -0.002(3) -0.003(3) 
C3X 0.036(4) 0.011(3) 0.036(4) -0.008(3) -0.005(3) 0.000(3) 
C4X 0.037(4) 0.020(3) 0.025(3) 0.002(3) -0.004(3) 0.005(3) 
C5X 0.039(4) 0.016(3) 0.025(3) -0.003(3) 0.004(3) 0.004(3) 
C6X 0.031(4) 0.009(3) 0.027(3) -0.002(2) 0.002(3) 0.000(3) 
C7X 0.031(4) 0.010(3) 0.031(4) -0.002(3) 0.008(3) 0.008(3) 
C8X 0.041(4) 0.014(3) 0.032(4) -0.001(3) 0.007(3) 0.001(3) 
C9X 0.046(5) 0.023(4) 0.047(5) 0.007(3) 0.018(4) 0.005(3) 
C10X 0.036(4) 0.016(3) 0.056(5) -0.001(3) 0.012(4) 0.001(3) 
C11X 0.034(4) 0.015(3) 0.039(4) -0.002(3) 0.004(3) 0.002(3) 
C12X 0.030(4) 0.010(3) 0.032(4) -0.001(3) 0.003(3) 0.003(3) 
C13X 0.031(4) 0.009(3) 0.027(3) -0.005(2) -0.002(3) -0.005(3) 
C14X 0.037(4) 0.020(3) 0.030(4) -0.006(3) -0.004(3) 0.000(3) 
C15X 0.039(4) 0.023(4) 0.027(4) -0.008(3) -0.011(3) 0.001(3) 
C16X 0.048(4) 0.010(3) 0.021(3) -0.001(2) 0.006(3) 0.002(3) 
C17X 0.033(4) 0.009(3) 0.024(3) -0.006(2) 0.000(3) 0.003(3) 
C18X 0.029(4) 0.006(3) 0.025(3) -0.005(2) 0.003(3) -0.001(2) 
C19X 0.037(4) 0.015(3) 0.036(4) -0.003(3) -0.006(3) 0.004(3) 
C20X 0.039(4) 0.025(4) 0.043(4) 0.004(3) -0.006(4) 0.000(3) 
C21X 0.032(4) 0.041(5) 0.052(5) 0.013(4) -0.001(4) 0.001(4) 
C22X 0.039(5) 0.079(8) 0.070(7) 0.020(6) -0.003(5) 0.010(5) 
C1A 0.059(6) 0.051(5) 0.021(4) 0.003(3) 0.008(4) -0.007(5) 
C2A 0.066(6) 0.059(6) 0.027(4) 0.004(4) -0.003(4) -0.026(5) 
C3A 0.095(9) 0.040(5) 0.037(5) 0.007(4) -0.016(5) -0.018(6) 
C4A 0.102(9) 0.070(7) 0.018(4) 0.006(4) -0.022(5) 0.035(7) 
C5A 0.051(6) 0.080(7) 0.021(4) 0.007(4) -0.007(4) -0.012(5) 
C6A 0.062(6) 0.046(5) 0.022(4) 0.002(3) 0.003(4) -0.019(5) 
N1A 0.077(7) 0.086(8) 0.035(4) 0.010(4) 0.018(4) 0.010(6) 
O1A 0.077(6) 0.158(10) 0.068(6) 0.029(6) 0.038(5) 0.022(7) 
O2A 0.139(9) 0.052(5) 0.087(6) 0.002(5) 0.012(6) 0.022(6) 
C1B 0.042(5) 0.078(6) 0.077(6) -0.031(5) -0.011(5) 0.006(5) 
C2B 0.083(7) 0.088(7) 0.072(6) -0.012(6) 0.006(6) -0.020(6) 
C3B 0.121(9) 0.099(8) 0.114(9) -0.025(7) 0.020(7) -0.031(7) 
C4B 0.087(7) 0.103(8) 0.104(8) -0.042(7) 0.016(7) -0.022(7) 
C5B 0.047(5) 0.118(8) 0.075(6) -0.035(6) -0.004(5) -0.001(6) 
C6B 0.034(5) 0.121(8) 0.081(7) -0.009(6) -0.010(5) -0.002(5) 
N1B 0.069(6) 0.102(7) 0.114(7) 0.020(6) -0.005(6) 0.004(6) 
O1B 0.084(5) 0.094(6) 0.076(5) -0.017(4) -0.019(4) 0.012(5) 
O2B 0.129(8) 0.133(8) 0.167(8) 0.017(7) 0.036(7) 0.013(7) 
C1D 0.031(4) 0.060(6) 0.026(4) 0.011(4) -0.002(3) 0.012(4) 
C2D 0.134(12) 0.040(6) 0.043(6) 0.002(4) -0.001(6) 0.027(7) 
C3D 0.191(17) 0.058(7) 0.034(5) -0.002(5) 0.000(7) 0.025(9) 
C4D 0.112(10) 0.054(6) 0.033(5) 0.012(4) 0.010(6) 0.009(6) 
C5D 0.085(8) 0.052(6) 0.047(6) 0.011(5) -0.010(5) -0.005(6) 
C6D 0.049(5) 0.060(6) 0.037(5) 0.002(4) -0.009(4) -0.014(5) 
N1D 0.039(4) 0.065(6) 0.039(4) 0.014(4) -0.004(3) 0.013(4) 
O1D 0.077(5) 0.057(5) 0.051(4) 0.019(3) 0.003(4) 0.015(4) 
O2D 0.077(5) 0.112(7) 0.026(3) 0.005(4) -0.015(3) -0.002(5) 
C1E 0.019(4) 0.026(5) 0.050(6) 0.006(4) -0.012(4) 0.001(4) 
C2E 0.038(6) 0.051(7) 0.042(6) -0.001(5) -0.001(5) -0.002(5) 
C3E 0.060(8) 0.080(9) 0.042(6) 0.025(6) -0.002(6) 0.005(7) 
C4E 0.059(8) 0.047(7) 0.083(9) 0.030(7) -0.025(7) -0.009(6) 
C5E 0.054(7) 0.027(5) 0.086(10) 0.003(6) -0.037(7) -0.014(5) 
C6E 0.038(6) 0.039(6) 0.057(7) -0.003(5) -0.022(5) 0.001(5) 
N1E 0.042(5) 0.032(5) 0.057(6) 0.007(4) -0.003(4) 0.001(4) 
O1E 0.069(7) 0.030(5) 0.094(9) 0.005(6) -0.001(7) 0.008(5) 
O2E 0.063(6) 0.063(6) 0.057(5) 0.015(4) -0.022(4) 0.010(4) 
C1G 0.09(2) 0.051(19) 0.06(2) -0.008(17) 0.009(19) -0.008(19) 
C2G 0.10(3) 0.06(2) 0.07(2) -0.009(19) 0.01(2) -0.01(2) 
C3G 0.10(3) 0.06(2) 0.08(2) 0.00(2) 0.00(2) -0.02(2) 
C4G 0.09(3) 0.06(2) 0.08(3) 0.01(2) -0.01(2) -0.02(2) 
C5G 0.09(3) 0.05(2) 0.07(2) -0.006(19) 0.00(2) -0.01(2) 
C6G 0.09(3) 0.05(2) 0.07(2) -0.012(18) 0.00(2) -0.01(2) 
N1G 0.10(3) 0.05(2) 0.046(19) 0.002(19) 0.017(19) -0.01(2) 
O1G 0.11(3) 0.09(3) 0.03(2) 0.01(2) 0.02(2) -0.02(3) 
O2G 0.13(4) 0.03(2) 0.05(2) 0.031(19) 0.02(2) 0.03(2) 
Zn1 0.0217(4) 0.0184(4) 0.0151(3) 0.0025(3) -0.0015(3) -0.0035(3) 
Zn2 0.0185(4) 0.0165(4) 0.0227(4) -0.0002(3) 0.0022(3) 0.0010(3) 
Zn3 0.0200(4) 0.0206(4) 0.0164(3) -0.0011(3) -0.0008(3) 0.0037(3) 
I1 0.0313(2) 0.0186(2) 0.0286(2) -0.00102(17) -0.00336(19) 0.00052(18) 
I2 0.0225(2) 0.0474(3) 0.0318(2) 0.0156(2) 0.00367(19) -0.0036(2) 
I3 0.0349(3) 0.0273(2) 0.0317(2) 0.01262(19) 0.0090(2) 0.0072(2) 
I4 0.0309(3) 0.0389(3) 0.0378(3) -0.0127(2) -0.0023(2) -0.0093(2) 
I5 0.0204(2) 0.0393(3) 0.0265(2) 0.00307(19) 0.00107(18) 0.00211(19) 
I6 0.0407(3) 0.0230(2) 0.0325(2) 0.00223(19) -0.0016(2) 0.0078(2) 
C1 0.019(3) 0.028(3) 0.020(3) 0.005(3) -0.001(3) -0.006(3) 
C2 0.020(3) 0.023(3) 0.020(3) 0.005(3) 0.003(3) -0.004(3) 
C3 0.022(3) 0.013(3) 0.014(3) 0.001(2) -0.001(2) -0.005(2) 
C4 0.017(3) 0.017(3) 0.017(3) -0.001(2) 0.001(2) 0.003(2) 
C5 0.021(3) 0.017(3) 0.015(3) -0.001(2) -0.001(2) 0.003(2) 
C6 0.020(3) 0.027(3) 0.016(3) 0.000(3) 0.000(3) -0.002(3) 
C7 0.020(3) 0.021(3) 0.015(3) 0.002(2) -0.004(2) -0.001(3) 
C8 0.017(3) 0.008(3) 0.023(3) 0.000(2) 0.003(2) 0.000(2) 
C9 0.023(3) 0.021(3) 0.015(3) 0.004(2) 0.001(2) 0.002(3) 
C10 0.024(3) 0.020(3) 0.015(3) 0.003(2) -0.004(3) 0.003(3) 
C11 0.022(3) 0.019(3) 0.017(3) -0.002(2) 0.000(3) 0.002(3) 
C12 0.022(3) 0.015(3) 0.015(3) 0.000(2) 0.000(2) 0.001(2) 
C13 0.021(3) 0.007(3) 0.023(3) -0.001(2) 0.001(3) -0.003(2) 
C14 0.026(3) 0.018(3) 0.018(3) 0.000(2) -0.002(3) 0.000(3) 
C15 0.023(3) 0.021(3) 0.019(3) 0.001(2) 0.004(3) -0.003(3) 
C16 0.021(3) 0.010(3) 0.014(3) 0.000(2) 0.001(2) -0.003(2) 
C17 0.025(3) 0.004(2) 0.017(3) -0.001(2) 0.003(2) 0.001(2) 
C18 0.018(3) 0.007(3) 0.023(3) -0.003(2) 0.002(2) -0.003(2) 
C19 0.029(4) 0.023(3) 0.018(3) 0.001(3) -0.001(3) -0.005(3) 
C20 0.031(4) 0.021(3) 0.018(3) 0.001(3) 0.005(3) -0.005(3) 
C21 0.024(3) 0.019(3) 0.016(3) 0.000(2) -0.003(3) 0.002(3) 
C22 0.022(3) 0.017(3) 0.017(3) 0.003(2) -0.001(2) -0.002(2) 
C23 0.021(3) 0.016(3) 0.021(3) 0.000(2) -0.002(3) -0.002(3) 
C24 0.031(4) 0.019(3) 0.023(3) -0.006(3) 0.010(3) -0.004(3) 
C25 0.030(4) 0.016(3) 0.031(4) -0.006(3) 0.007(3) -0.004(3) 
C26 0.017(3) 0.018(3) 0.017(3) 0.002(2) 0.004(2) -0.004(2) 
C27 0.032(4) 0.017(3) 0.021(3) -0.003(3) 0.007(3) -0.001(3) 
C28 0.031(4) 0.016(3) 0.022(3) -0.003(3) 0.002(3) 0.000(3) 
C29 0.030(4) 0.018(3) 0.019(3) 0.003(2) 0.002(3) 0.001(3) 
C30 0.033(4) 0.020(3) 0.019(3) 0.000(3) -0.001(3) -0.003(3) 
C31 0.019(3) 0.016(3) 0.022(3) 0.000(2) 0.001(3) -0.001(2) 
C32 0.036(4) 0.018(3) 0.020(3) 0.001(2) 0.005(3) -0.012(3) 
C33 0.038(4) 0.027(4) 0.018(3) -0.001(3) -0.006(3) -0.007(3) 
C34 0.025(3) 0.020(3) 0.016(3) 0.000(2) -0.001(3) 0.002(3) 
C35 0.021(3) 0.016(3) 0.022(3) 0.000(2) 0.001(3) 0.002(2) 
C36 0.020(3) 0.017(3) 0.022(3) 0.000(2) -0.001(3) -0.001(2) 
N1 0.022(3) 0.019(3) 0.015(2) 0.001(2) -0.007(2) -0.002(2) 
N2 0.018(3) 0.017(3) 0.023(3) 0.002(2) 0.003(2) 0.002(2) 
N3 0.017(3) 0.012(2) 0.021(3) -0.003(2) 0.000(2) 0.001(2) 
N4 0.026(3) 0.009(2) 0.017(2) -0.0005(19) 0.000(2) 0.000(2) 
N5 0.021(3) 0.011(2) 0.015(2) 0.0000(19) -0.003(2) 0.002(2) 
N6 0.021(3) 0.012(2) 0.015(2) 0.0004(19) 0.001(2) -0.002(2) 
N7 0.018(3) 0.023(3) 0.014(2) 0.003(2) -0.001(2) 0.005(2) 
N8 0.025(3) 0.014(2) 0.017(2) 0.001(2) 0.005(2) 0.002(2) 
N9 0.021(3) 0.016(3) 0.018(3) 0.000(2) 0.002(2) -0.004(2) 
N10 0.022(3) 0.020(3) 0.015(2) -0.001(2) -0.001(2) -0.003(2) 
N11 0.023(3) 0.015(3) 0.022(3) 0.000(2) 0.004(2) 0.001(2) 
N12 0.024(3) 0.016(3) 0.021(3) -0.001(2) 0.001(2) -0.001(2) 
  
_geom_special_details 
; 
 All esds (except the esd in the dihedral angle between two l.s. planes) 
 are estimated using the full covariance matrix.  The cell esds are taken 
 into account individually in the estimation of esds in distances, angles 
 and torsion angles; correlations between esds in cell parameters are only 
 used when they are defined by crystal symmetry.  An approximate (isotropic) 
 treatment of cell esds is used for estimating esds involving l.s. planes. 
; 
  
loop_ 
 _geom_bond_atom_site_label_1 
 _geom_bond_atom_site_label_2 
 _geom_bond_distance 
 _geom_bond_site_symmetry_2 
 _geom_bond_publ_flag 
C1X C2X 1.413(10) . ? 
C1X C6X 1.421(9) . ? 
C1X C18X 1.467(9) . ? 
C2X C3X 1.394(10) . ? 
C2X H2XA 0.9500 . ? 
C3X C4X 1.407(10) . ? 
C3X C19X 1.462(11) . ? 
C4X C5X 1.371(10) . ? 
C4X H4XA 0.9500 . ? 
C5X C6X 1.415(10) . ? 
C5X H5XA 0.9500 . ? 
C6X C7X 1.472(10) . ? 
C7X C12X 1.397(10) . ? 
C7X C8X 1.422(10) . ? 
C8X C9X 1.385(12) . ? 
C8X H8XA 0.9500 . ? 
C9X C10X 1.402(12) . ? 
C9X H9XA 0.9500 . ? 
C10X C11X 1.377(11) . ? 
C10X H10A 0.9500 . ? 
C11X C12X 1.415(10) . ? 
C11X H11A 0.9500 . ? 
C12X C13X 1.467(10) . ? 
C13X C14X 1.411(10) . ? 
C13X C18X 1.414(10) . ? 
C14X C15X 1.362(11) . ? 
C14X H14A 0.9500 . ? 
C15X C16X 1.393(11) . ? 
C15X H15A 0.9500 . ? 
C16X C17X 1.387(10) . ? 
C16X H16A 0.9500 . ? 
C17X C18X 1.413(9) . ? 
C17X H17A 0.9500 . ? 
C19X C20X 1.337(11) . ? 
C19X H19A 0.9500 . ? 
C20X C21X 1.457(11) . ? 
C20X H20A 0.9500 . ? 
C21X C22X 1.310(14) . ? 
C21X H21A 0.9500 . ? 
C22X H22B 0.9500 . ? 
C22X H22C 0.9500 . ? 
C1A C2A 1.358(13) . ? 
C1A C6A 1.375(13) . ? 
C1A N1A 1.520(14) . ? 
C2A C3A 1.369(15) . ? 
C2A H2AA 0.9500 . ? 
C3A C4A 1.413(16) . ? 
C3A H3AA 0.9500 . ? 
C4A C5A 1.405(15) . ? 
C4A H4AA 0.9500 . ? 
C5A C6A 1.355(14) . ? 
C5A H5AA 0.9500 . ? 
C6A H6AA 0.9500 . ? 
N1A O1A 1.219(13) . ? 
N1A O2A 1.230(13) . ? 
C1B C2B 1.3900 . ? 
C1B C6B 1.3900 . ? 
C1B N1B 1.355(15) . ? 
C2B C3B 1.3900 . ? 
C2B H2BA 0.9500 . ? 
C3B C4B 1.3900 . ? 
C3B H3BA 0.9500 . ? 
C4B C5B 1.3900 . ? 
C4B H4BA 0.9500 . ? 
C5B C6B 1.3900 . ? 
C5B H5BA 0.9500 . ? 
C6B H6BA 0.9500 . ? 
N1B O2B 1.238(16) . ? 
N1B O1B 1.325(15) . ? 
C1D C2D 1.372(13) . ? 
C1D C6D 1.378(13) . ? 
C1D N1D 1.463(10) . ? 
C2D C3D 1.372(14) . ? 
C2D H2DA 0.9500 . ? 
C3D C4D 1.377(16) . ? 
C3D H3DA 0.9500 . ? 
C4D C5D 1.357(14) . ? 
C4D H4DA 0.9500 . ? 
C5D C6D 1.386(13) . ? 
C5D H5DA 0.9500 . ? 
C6D H6DA 0.9500 . ? 
N1D O2D 1.212(10) . ? 
N1D O1D 1.219(11) . ? 
C1E C2E 1.3900 . ? 
C1E C6E 1.3900 . ? 
C1E N1E 1.437(9) . ? 
C2E C3E 1.3900 . ? 
C2E H2EA 0.9500 . ? 
C3E C4E 1.3900 . ? 
C3E H3EA 0.9500 . ? 
C4E C5E 1.3900 . ? 
C4E H4EA 0.9500 . ? 
C5E C6E 1.3900 . ? 
C5E H5EA 0.9500 . ? 
C6E H6EA 0.9500 . ? 
N1E O2E 1.226(11) . ? 
N1E O1E 1.234(11) . ? 
C1G C2G 1.3900 . ? 
C1G C6G 1.3900 . ? 
C1G N1G 1.460(18) . ? 
C2G C3G 1.3900 . ? 
C2G H2GA 0.9500 . ? 
C3G C4G 1.3900 . ? 
C3G H3GA 0.9500 . ? 
C4G C5G 1.3900 . ? 
C4G H4GA 0.9500 . ? 
C5G C6G 1.3900 . ? 
C5G H5GA 0.9500 . ? 
C6G H6GA 0.9500 . ? 
N1G O1G 1.23(2) . ? 
N1G O2G 1.24(2) . ? 
Zn1 N8 2.059(5) 2_654 ? 
Zn1 N1 2.061(5) . ? 
Zn1 I2 2.5498(10) . ? 
Zn1 I1 2.5658(9) . ? 
Zn2 N2 2.073(5) . ? 
Zn2 N9 2.077(5) 4_456 ? 
Zn2 I4 2.5461(9) . ? 
Zn2 I3 2.5510(9) . ? 
Zn3 N7 2.080(5) . ? 
Zn3 N3 2.085(5) . ? 
Zn3 I5 2.5389(9) . ? 
Zn3 I6 2.5513(9) . ? 
C1 N1 1.340(8) . ? 
C1 C2 1.377(9) . ? 
C1 H1A 0.9500 . ? 
C2 C3 1.389(9) . ? 
C2 H2A 0.9500 . ? 
C3 C4 1.390(9) . ? 
C3 C16 1.488(8) . ? 
C4 C5 1.373(8) . ? 
C4 H4A 0.9500 . ? 
C5 N1 1.338(8) . ? 
C5 H5A 0.9500 . ? 
C6 N2 1.346(8) . ? 
C6 C7 1.378(9) . ? 
C6 H6A 0.9500 . ? 
C7 C8 1.387(8) . ? 
C7 H7A 0.9500 . ? 
C8 C9 1.389(9) . ? 
C8 C17 1.494(9) . ? 
C9 C10 1.384(9) . ? 
C9 H9A 0.9500 . ? 
C10 N2 1.342(8) . ? 
C10 H10B 0.9500 . ? 
C11 N3 1.337(8) . ? 
C11 C12 1.379(9) . ? 
C11 H11B 0.9500 . ? 
C12 C13 1.389(9) . ? 
C12 H12A 0.9500 . ? 
C13 C14 1.377(9) . ? 
C13 C18 1.486(9) . ? 
C14 C15 1.382(9) . ? 
C14 H14B 0.9500 . ? 
C15 N3 1.350(8) . ? 
C15 H15B 0.9500 . ? 
C16 N6 1.337(8) . ? 
C16 N4 1.336(8) . ? 
C17 N5 1.329(8) . ? 
C17 N4 1.341(8) . ? 
C18 N6 1.335(8) . ? 
C18 N5 1.341(8) . ? 
C19 N7 1.342(8) . ? 
C19 C20 1.386(9) . ? 
C19 H19B 0.9500 . ? 
C20 C21 1.397(9) . ? 
C20 H20B 0.9500 . ? 
C21 C22 1.384(9) . ? 
C21 C34 1.491(9) . ? 
C22 C23 1.392(9) . ? 
C22 H22A 0.9500 . ? 
C23 N7 1.347(8) . ? 
C23 H23A 0.9500 . ? 
C24 N8 1.342(8) . ? 
C24 C25 1.390(9) . ? 
C24 H24A 0.9500 . ? 
C25 C26 1.387(9) . ? 
C25 H25A 0.9500 . ? 
C26 C27 1.394(9) . ? 
C26 C35 1.490(9) . ? 
C27 C28 1.387(9) . ? 
C27 H27A 0.9500 . ? 
C28 N8 1.339(8) . ? 
C28 H28A 0.9500 . ? 
C29 N9 1.331(8) . ? 
C29 C30 1.398(9) . ? 
C29 H29A 0.9500 . ? 
C30 C31 1.392(9) . ? 
C30 H30A 0.9500 . ? 
C31 C32 1.384(9) . ? 
C31 C36 1.483(9) . ? 
C32 C33 1.369(9) . ? 
C32 H32A 0.9500 . ? 
C33 N9 1.348(8) . ? 
C33 H33A 0.9500 . ? 
C34 N10 1.339(8) . ? 
C34 N12 1.343(8) . ? 
C35 N11 1.327(8) . ? 
C35 N10 1.341(8) . ? 
C36 N11 1.336(8) . ? 
C36 N12 1.348(8) . ? 
N8 Zn1 2.059(5) 2_655 ? 
N9 Zn2 2.077(5) 4_556 ? 
  
loop_ 
 _geom_angle_atom_site_label_1 
 _geom_angle_atom_site_label_2 
 _geom_angle_atom_site_label_3 
 _geom_angle 
 _geom_angle_site_symmetry_1 
 _geom_angle_site_symmetry_3 
 _geom_angle_publ_flag 
C2X C1X C6X 118.6(6) . . ? 
C2X C1X C18X 121.0(6) . . ? 
C6X C1X C18X 120.4(6) . . ? 
C3X C2X C1X 121.9(7) . . ? 
C3X C2X H2XA 119.1 . . ? 
C1X C2X H2XA 119.1 . . ? 
C2X C3X C4X 118.0(7) . . ? 
C2X C3X C19X 121.5(7) . . ? 
C4X C3X C19X 120.4(7) . . ? 
C5X C4X C3X 121.9(7) . . ? 
C5X C4X H4XA 119.1 . . ? 
C3X C4X H4XA 119.1 . . ? 
C4X C5X C6X 120.4(7) . . ? 
C4X C5X H5XA 119.8 . . ? 
C6X C5X H5XA 119.8 . . ? 
C5X C6X C1X 119.1(6) . . ? 
C5X C6X C7X 121.6(6) . . ? 
C1X C6X C7X 119.2(6) . . ? 
C12X C7X C8X 119.6(7) . . ? 
C12X C7X C6X 120.1(6) . . ? 
C8X C7X C6X 120.3(7) . . ? 
C9X C8X C7X 120.2(7) . . ? 
C9X C8X H8XA 119.9 . . ? 
C7X C8X H8XA 119.9 . . ? 
C8X C9X C10X 120.2(8) . . ? 
C8X C9X H9XA 119.9 . . ? 
C10X C9X H9XA 119.9 . . ? 
C11X C10X C9X 119.7(8) . . ? 
C11X C10X H10A 120.2 . . ? 
C9X C10X H10A 120.2 . . ? 
C10X C11X C12X 121.4(8) . . ? 
C10X C11X H11A 119.3 . . ? 
C12X C11X H11A 119.3 . . ? 
C7X C12X C11X 118.8(7) . . ? 
C7X C12X C13X 120.7(6) . . ? 
C11X C12X C13X 120.5(7) . . ? 
C14X C13X C18X 118.2(6) . . ? 
C14X C13X C12X 121.9(7) . . ? 
C18X C13X C12X 119.8(6) . . ? 
C15X C14X C13X 122.1(7) . . ? 
C15X C14X H14A 118.9 . . ? 
C13X C14X H14A 118.9 . . ? 
C14X C15X C16X 120.2(7) . . ? 
C14X C15X H15A 119.9 . . ? 
C16X C15X H15A 119.9 . . ? 
C17X C16X C15X 119.4(7) . . ? 
C17X C16X H16A 120.3 . . ? 
C15X C16X H16A 120.3 . . ? 
C16X C17X C18X 121.3(7) . . ? 
C16X C17X H17A 119.4 . . ? 
C18X C17X H17A 119.4 . . ? 
C13X C18X C17X 118.7(6) . . ? 
C13X C18X C1X 119.6(6) . . ? 
C17X C18X C1X 121.6(6) . . ? 
C20X C19X C3X 127.7(7) . . ? 
C20X C19X H19A 116.1 . . ? 
C3X C19X H19A 116.1 . . ? 
C19X C20X C21X 123.6(8) . . ? 
C19X C20X H20A 118.2 . . ? 
C21X C20X H20A 118.2 . . ? 
C22X C21X C20X 122.4(9) . . ? 
C22X C21X H21A 118.8 . . ? 
C20X C21X H21A 118.8 . . ? 
C21X C22X H22B 120.0 . . ? 
C21X C22X H22C 120.0 . . ? 
H22B C22X H22C 120.0 . . ? 
C2A C1A C6A 123.7(10) . . ? 
C2A C1A N1A 119.2(10) . . ? 
C6A C1A N1A 117.1(9) . . ? 
C1A C2A C3A 118.1(10) . . ? 
C1A C2A H2AA 121.0 . . ? 
C3A C2A H2AA 121.0 . . ? 
C2A C3A C4A 120.7(9) . . ? 
C2A C3A H3AA 119.6 . . ? 
C4A C3A H3AA 119.6 . . ? 
C5A C4A C3A 118.2(10) . . ? 
C5A C4A H4AA 120.9 . . ? 
C3A C4A H4AA 120.9 . . ? 
C6A C5A C4A 120.7(10) . . ? 
C6A C5A H5AA 119.7 . . ? 
C4A C5A H5AA 119.7 . . ? 
C5A C6A C1A 118.6(9) . . ? 
C5A C6A H6AA 120.7 . . ? 
C1A C6A H6AA 120.7 . . ? 
O1A N1A O2A 126.8(12) . . ? 
O1A N1A C1A 116.5(11) . . ? 
O2A N1A C1A 116.7(10) . . ? 
C2B C1B C6B 120.0 . . ? 
C2B C1B N1B 117.8(9) . . ? 
C6B C1B N1B 122.2(9) . . ? 
C3B C2B C1B 120.0 . . ? 
C3B C2B H2BA 120.0 . . ? 
C1B C2B H2BA 120.0 . . ? 
C2B C3B C4B 120.0 . . ? 
C2B C3B H3BA 120.0 . . ? 
C4B C3B H3BA 120.0 . . ? 
C5B C4B C3B 120.0 . . ? 
C5B C4B H4BA 120.0 . . ? 
C3B C4B H4BA 120.0 . . ? 
C4B C5B C6B 120.0 . . ? 
C4B C5B H5BA 120.0 . . ? 
C6B C5B H5BA 120.0 . . ? 
C5B C6B C1B 120.0 . . ? 
C5B C6B H6BA 120.0 . . ? 
C1B C6B H6BA 120.0 . . ? 
O2B N1B O1B 126.9(14) . . ? 
O2B N1B C1B 112.1(14) . . ? 
O1B N1B C1B 120.6(12) . . ? 
C2D C1D C6D 121.5(8) . . ? 
C2D C1D N1D 118.8(9) . . ? 
C6D C1D N1D 119.7(8) . . ? 
C1D C2D C3D 118.2(10) . . ? 
C1D C2D H2DA 120.9 . . ? 
C3D C2D H2DA 120.9 . . ? 
C4D C3D C2D 121.0(11) . . ? 
C4D C3D H3DA 119.5 . . ? 
C2D C3D H3DA 119.5 . . ? 
C5D C4D C3D 120.4(10) . . ? 
C5D C4D H4DA 119.8 . . ? 
C3D C4D H4DA 119.8 . . ? 
C4D C5D C6D 119.7(10) . . ? 
C4D C5D H5DA 120.1 . . ? 
C6D C5D H5DA 120.1 . . ? 
C1D C6D C5D 119.1(9) . . ? 
C1D C6D H6DA 120.4 . . ? 
C5D C6D H6DA 120.4 . . ? 
O2D N1D O1D 122.5(8) . . ? 
O2D N1D C1D 118.4(9) . . ? 
O1D N1D C1D 119.1(8) . . ? 
C2E C1E C6E 120.0 . . ? 
C2E C1E N1E 120.3(6) . . ? 
C6E C1E N1E 119.7(6) . . ? 
C3E C2E C1E 120.0 . . ? 
C3E C2E H2EA 120.0 . . ? 
C1E C2E H2EA 120.0 . . ? 
C2E C3E C4E 120.0 . . ? 
C2E C3E H3EA 120.0 . . ? 
C4E C3E H3EA 120.0 . . ? 
C3E C4E C5E 120.0 . . ? 
C3E C4E H4EA 120.0 . . ? 
C5E C4E H4EA 120.0 . . ? 
C6E C5E C4E 120.0 . . ? 
C6E C5E H5EA 120.0 . . ? 
C4E C5E H5EA 120.0 . . ? 
C5E C6E C1E 120.0 . . ? 
C5E C6E H6EA 120.0 . . ? 
C1E C6E H6EA 120.0 . . ? 
O2E N1E O1E 124.7(9) . . ? 
O2E N1E C1E 117.5(8) . . ? 
O1E N1E C1E 117.8(9) . . ? 
C2G C1G C6G 120.0 . . ? 
C2G C1G N1G 121.3(15) . . ? 
C6G C1G N1G 118.7(15) . . ? 
C3G C2G C1G 120.0 . . ? 
C3G C2G H2GA 120.0 . . ? 
C1G C2G H2GA 120.0 . . ? 
C2G C3G C4G 120.0 . . ? 
C2G C3G H3GA 120.0 . . ? 
C4G C3G H3GA 120.0 . . ? 
C5G C4G C3G 120.0 . . ? 
C5G C4G H4GA 120.0 . . ? 
C3G C4G H4GA 120.0 . . ? 
C4G C5G C6G 120.0 . . ? 
C4G C5G H5GA 120.0 . . ? 
C6G C5G H5GA 120.0 . . ? 
C5G C6G C1G 120.0 . . ? 
C5G C6G H6GA 120.0 . . ? 
C1G C6G H6GA 120.0 . . ? 
O1G N1G O2G 122(3) . . ? 
O1G N1G C1G 120(3) . . ? 
O2G N1G C1G 118(2) . . ? 
N8 Zn1 N1 104.7(2) 2_654 . ? 
N8 Zn1 I2 110.95(16) 2_654 . ? 
N1 Zn1 I2 108.22(15) . . ? 
N8 Zn1 I1 105.43(15) 2_654 . ? 
N1 Zn1 I1 105.84(15) . . ? 
I2 Zn1 I1 120.52(3) . . ? 
N2 Zn2 N9 101.5(2) . 4_456 ? 
N2 Zn2 I4 104.20(15) . . ? 
N9 Zn2 I4 108.40(15) 4_456 . ? 
N2 Zn2 I3 109.66(15) . . ? 
N9 Zn2 I3 107.80(14) 4_456 . ? 
I4 Zn2 I3 123.14(3) . . ? 
N7 Zn3 N3 100.0(2) . . ? 
N7 Zn3 I5 110.39(16) . . ? 
N3 Zn3 I5 104.46(15) . . ? 
N7 Zn3 I6 105.85(15) . . ? 
N3 Zn3 I6 110.76(14) . . ? 
I5 Zn3 I6 123.05(3) . . ? 
N1 C1 C2 122.8(6) . . ? 
N1 C1 H1A 118.6 . . ? 
C2 C1 H1A 118.6 . . ? 
C1 C2 C3 118.8(6) . . ? 
C1 C2 H2A 120.6 . . ? 
C3 C2 H2A 120.6 . . ? 
C4 C3 C2 118.4(6) . . ? 
C4 C3 C16 121.2(6) . . ? 
C2 C3 C16 120.3(6) . . ? 
C5 C4 C3 119.1(6) . . ? 
C5 C4 H4A 120.5 . . ? 
C3 C4 H4A 120.5 . . ? 
N1 C5 C4 122.7(6) . . ? 
N1 C5 H5A 118.7 . . ? 
C4 C5 H5A 118.7 . . ? 
N2 C6 C7 123.1(6) . . ? 
N2 C6 H6A 118.5 . . ? 
C7 C6 H6A 118.5 . . ? 
C6 C7 C8 118.6(6) . . ? 
C6 C7 H7A 120.7 . . ? 
C8 C7 H7A 120.7 . . ? 
C7 C8 C9 119.2(6) . . ? 
C7 C8 C17 120.9(6) . . ? 
C9 C8 C17 119.9(5) . . ? 
C10 C9 C8 118.4(6) . . ? 
C10 C9 H9A 120.8 . . ? 
C8 C9 H9A 120.8 . . ? 
N2 C10 C9 123.0(6) . . ? 
N2 C10 H10B 118.5 . . ? 
C9 C10 H10B 118.5 . . ? 
N3 C11 C12 122.8(6) . . ? 
N3 C11 H11B 118.6 . . ? 
C12 C11 H11B 118.6 . . ? 
C11 C12 C13 119.1(6) . . ? 
C11 C12 H12A 120.4 . . ? 
C13 C12 H12A 120.4 . . ? 
C14 C13 C12 118.4(6) . . ? 
C14 C13 C18 121.4(6) . . ? 
C12 C13 C18 120.2(6) . . ? 
C13 C14 C15 119.4(6) . . ? 
C13 C14 H14B 120.3 . . ? 
C15 C14 H14B 120.3 . . ? 
N3 C15 C14 122.3(6) . . ? 
N3 C15 H15B 118.8 . . ? 
C14 C15 H15B 118.8 . . ? 
N6 C16 N4 125.2(5) . . ? 
N6 C16 C3 117.3(5) . . ? 
N4 C16 C3 117.5(5) . . ? 
N5 C17 N4 125.5(6) . . ? 
N5 C17 C8 118.0(5) . . ? 
N4 C17 C8 116.5(6) . . ? 
N6 C18 N5 125.7(6) . . ? 
N6 C18 C13 117.2(5) . . ? 
N5 C18 C13 117.1(5) . . ? 
N7 C19 C20 122.5(6) . . ? 
N7 C19 H19B 118.7 . . ? 
C20 C19 H19B 118.7 . . ? 
C19 C20 C21 118.7(6) . . ? 
C19 C20 H20B 120.7 . . ? 
C21 C20 H20B 120.7 . . ? 
C22 C21 C20 118.9(6) . . ? 
C22 C21 C34 121.2(6) . . ? 
C20 C21 C34 119.8(6) . . ? 
C21 C22 C23 119.2(6) . . ? 
C21 C22 H22A 120.4 . . ? 
C23 C22 H22A 120.4 . . ? 
N7 C23 C22 121.9(6) . . ? 
N7 C23 H23A 119.0 . . ? 
C22 C23 H23A 119.0 . . ? 
N8 C24 C25 122.3(6) . . ? 
N8 C24 H24A 118.8 . . ? 
C25 C24 H24A 118.8 . . ? 
C26 C25 C24 119.0(6) . . ? 
C26 C25 H25A 120.5 . . ? 
C24 C25 H25A 120.5 . . ? 
C25 C26 C27 118.6(6) . . ? 
C25 C26 C35 121.1(6) . . ? 
C27 C26 C35 120.3(6) . . ? 
C28 C27 C26 119.0(6) . . ? 
C28 C27 H27A 120.5 . . ? 
C26 C27 H27A 120.5 . . ? 
N8 C28 C27 122.3(6) . . ? 
N8 C28 H28A 118.8 . . ? 
C27 C28 H28A 118.8 . . ? 
N9 C29 C30 122.4(6) . . ? 
N9 C29 H29A 118.8 . . ? 
C30 C29 H29A 118.8 . . ? 
C31 C30 C29 118.4(6) . . ? 
C31 C30 H30A 120.8 . . ? 
C29 C30 H30A 120.8 . . ? 
C32 C31 C30 118.8(6) . . ? 
C32 C31 C36 120.3(6) . . ? 
C30 C31 C36 120.8(6) . . ? 
C33 C32 C31 119.1(6) . . ? 
C33 C32 H32A 120.5 . . ? 
C31 C32 H32A 120.5 . . ? 
N9 C33 C32 122.9(6) . . ? 
N9 C33 H33A 118.5 . . ? 
C32 C33 H33A 118.5 . . ? 
N10 C34 N12 125.7(6) . . ? 
N10 C34 C21 117.0(6) . . ? 
N12 C34 C21 117.2(6) . . ? 
N11 C35 N10 125.9(6) . . ? 
N11 C35 C26 117.4(6) . . ? 
N10 C35 C26 116.6(6) . . ? 
N11 C36 N12 125.4(6) . . ? 
N11 C36 C31 116.8(6) . . ? 
N12 C36 C31 117.8(6) . . ? 
C5 N1 C1 118.2(5) . . ? 
C5 N1 Zn1 122.6(4) . . ? 
C1 N1 Zn1 118.1(4) . . ? 
C10 N2 C6 117.8(6) . . ? 
C10 N2 Zn2 121.2(4) . . ? 
C6 N2 Zn2 120.6(4) . . ? 
C11 N3 C15 117.9(6) . . ? 
C11 N3 Zn3 120.4(4) . . ? 
C15 N3 Zn3 121.7(4) . . ? 
C16 N4 C17 114.8(5) . . ? 
C17 N5 C18 114.3(5) . . ? 
C16 N6 C18 114.5(5) . . ? 
C19 N7 C23 118.8(6) . . ? 
C19 N7 Zn3 119.5(4) . . ? 
C23 N7 Zn3 121.5(4) . . ? 
C28 N8 C24 118.8(6) . . ? 
C28 N8 Zn1 119.9(4) . 2_655 ? 
C24 N8 Zn1 121.2(4) . 2_655 ? 
C29 N9 C33 118.3(6) . . ? 
C29 N9 Zn2 122.6(4) . 4_556 ? 
C33 N9 Zn2 119.0(4) . 4_556 ? 
C34 N10 C35 114.1(5) . . ? 
C35 N11 C36 114.8(5) . . ? 
C34 N12 C36 113.9(5) . . ? 
  
_diffrn_measured_fraction_theta_max    0.948 
_diffrn_reflns_theta_full              28.52 
_diffrn_measured_fraction_theta_full   0.948 
_refine_diff_density_max    2.019 
_refine_diff_density_min   -1.404 
_refine_diff_density_rms    0.167 
